# Supplementary material for: Gasdermin D-mediated neutrophil pyroptosis drives inflammation in psoriasis
Source: PubMed Central journal article supplement (PMC11668524; doi:10.7554/elife.101248), 2024-12-24

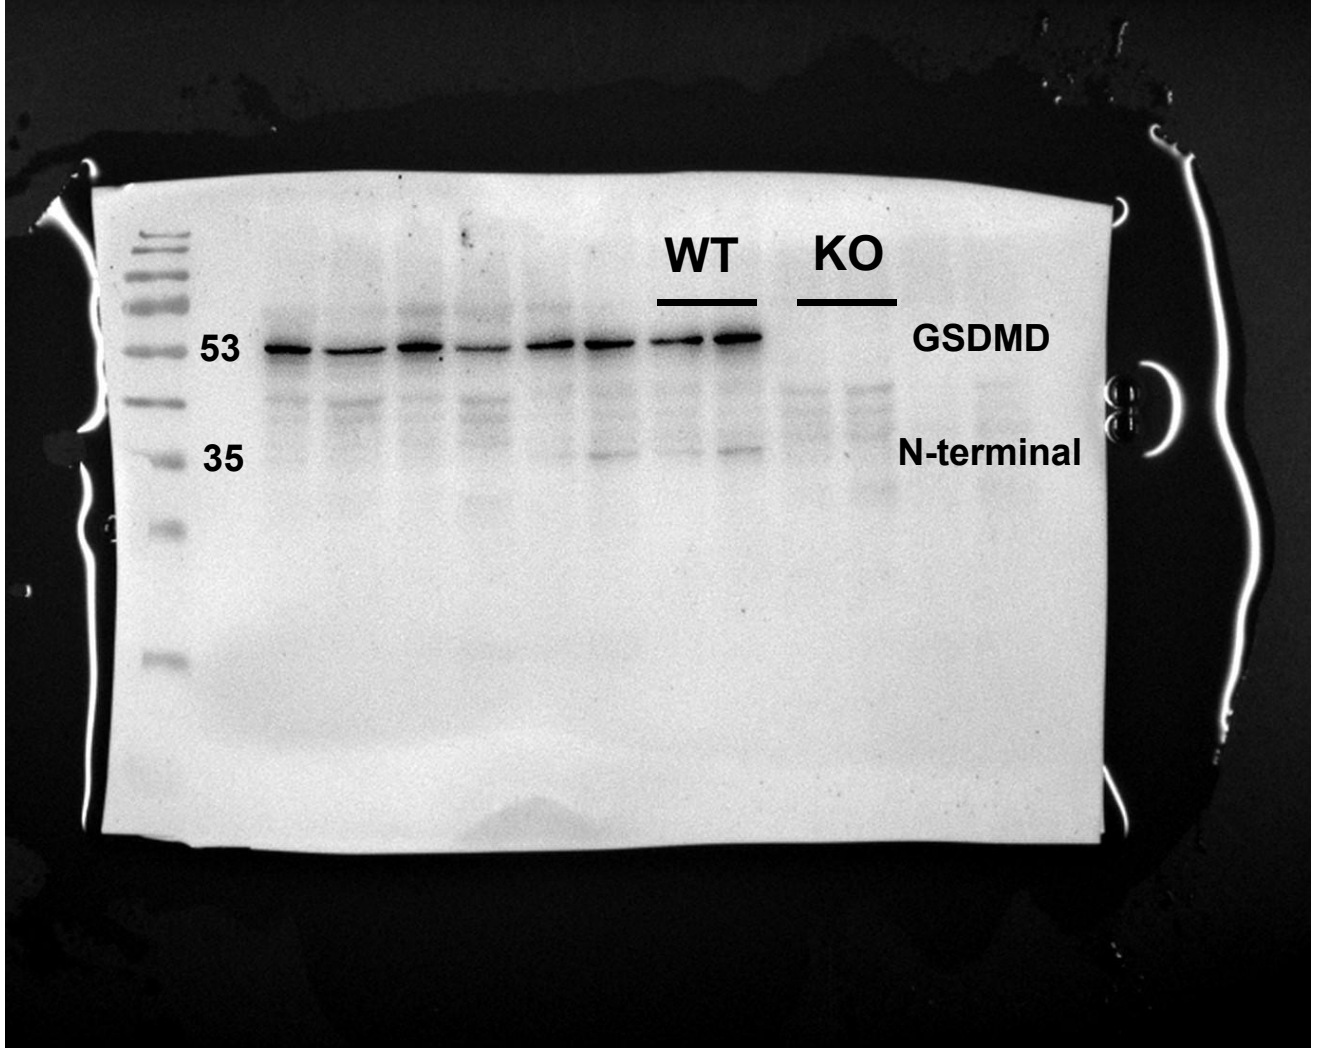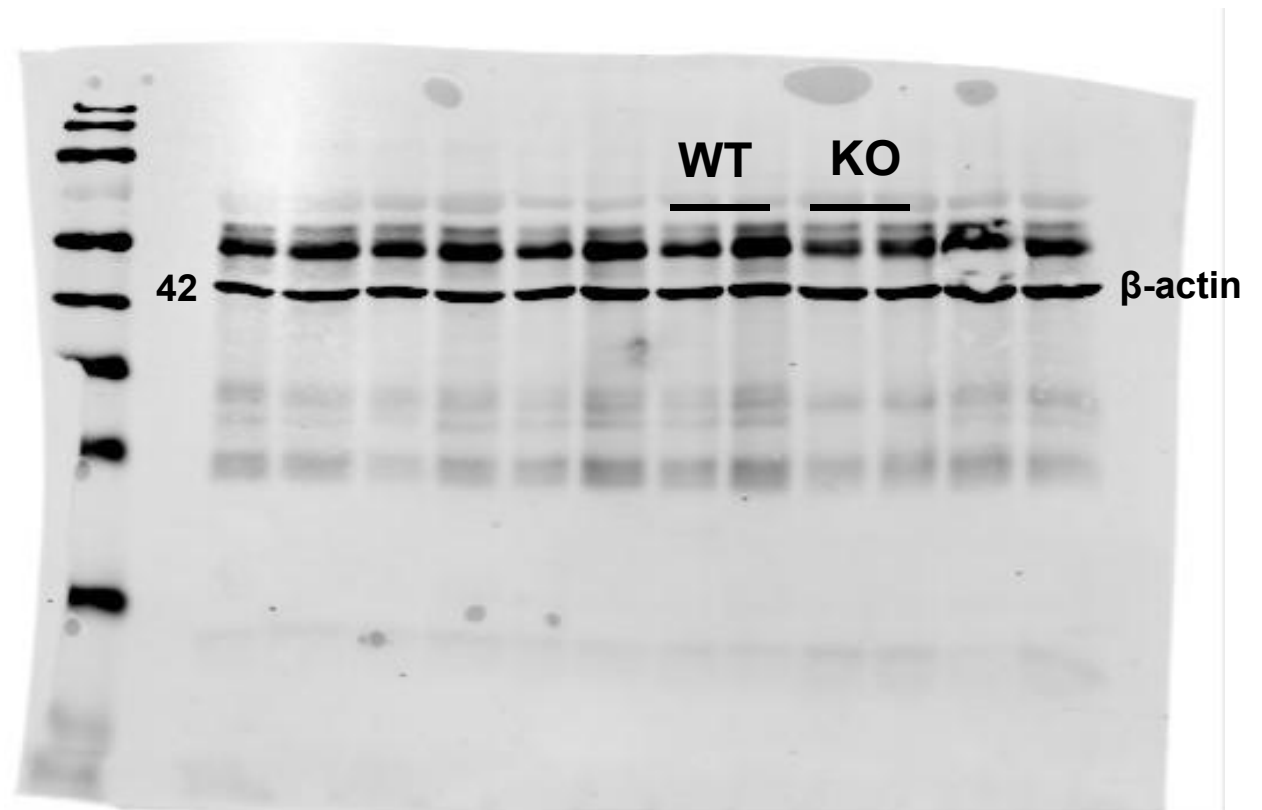

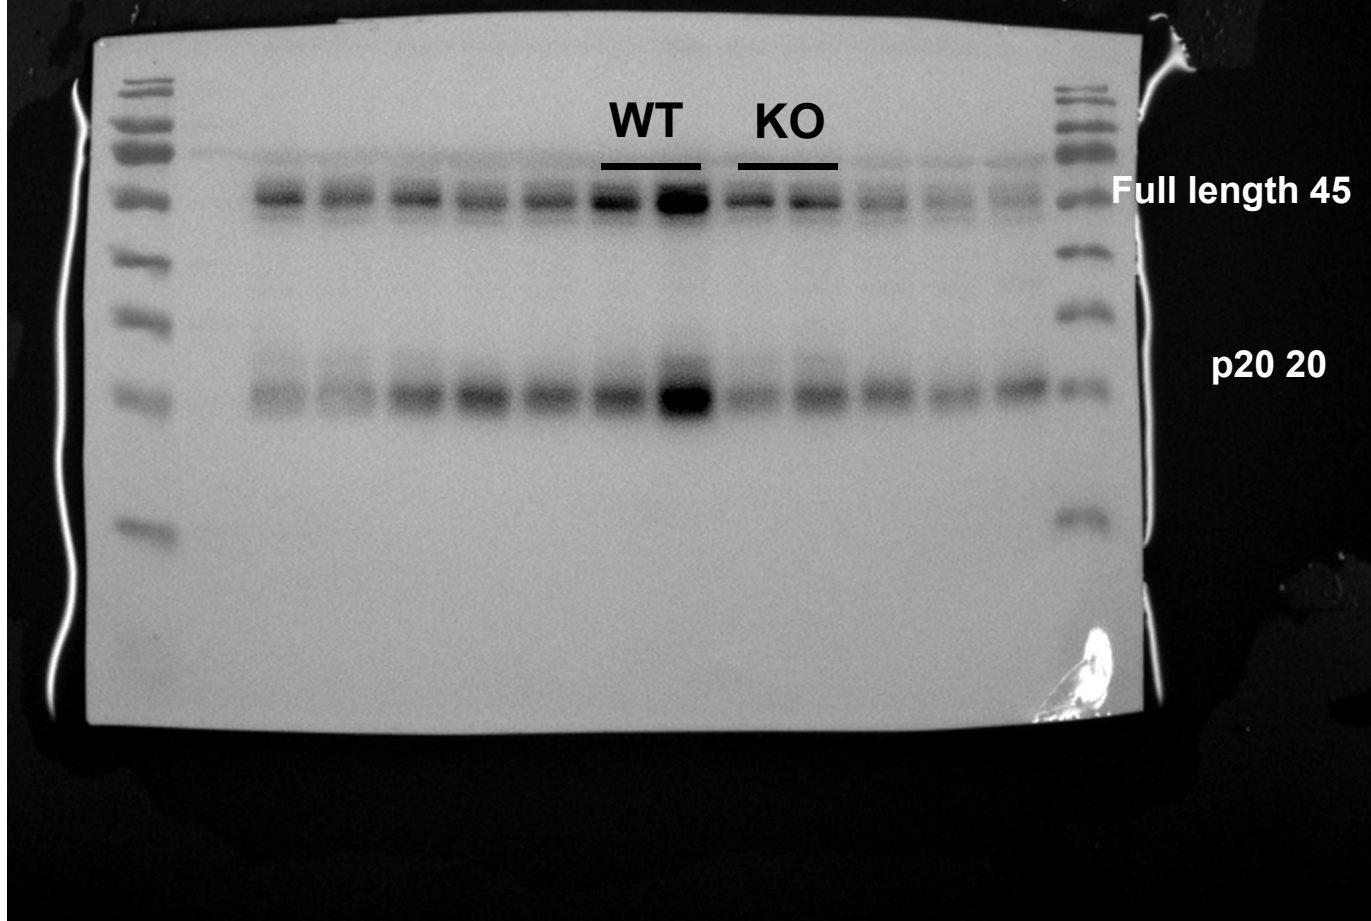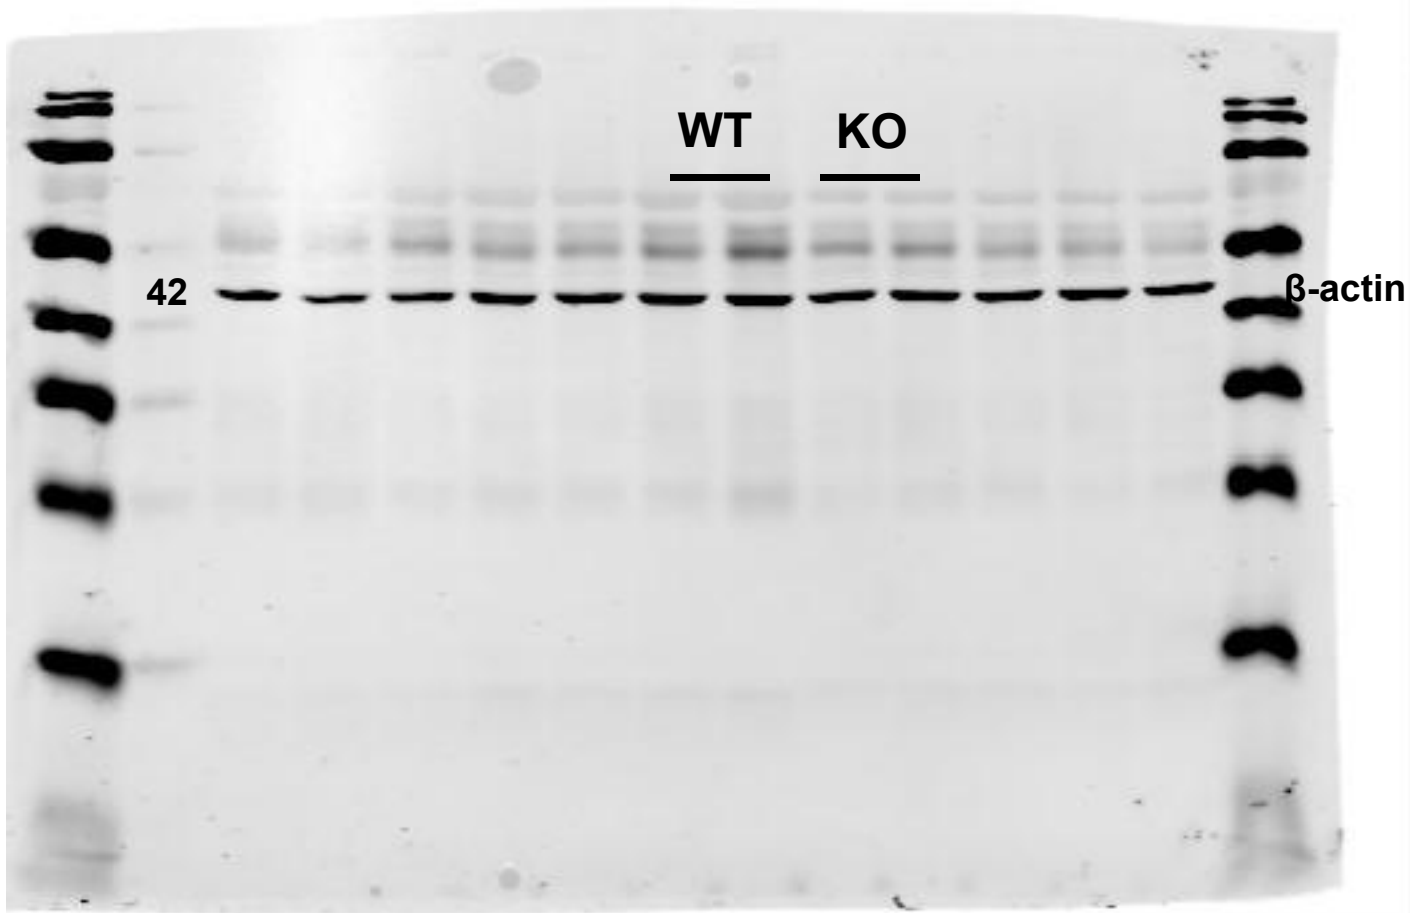

Supplement: elife-101248-fig2-data1.pdf [file elife-101248-fig2-data1.pdf]
